# Supplementary material for: Postprandial and Fasting Hepatic Glucose Fluxes in Long-Standing Type 1 Diabetes
Source: PubMed Central journal article supplement — Diabetes. 2011 May 21;60(6):1752–8. doi: 10.2337/db10-1001 (PMC3114392; doi:10.2337/db10-1001), 2011-05-21

SUPPLEMENTARY DATA

**Supplementary Table 1.** Individual fluxes of net glycogenolysis (GLYnet) and glycogen phosphorylase (GLYphos) fluxes measured with *vivo* <sup>13</sup>C MRS and <sup>2</sup>H<sub>2</sub>O methods, respectively. Values are expressed as absolute numbers (μmol.kg<sup>-1</sup>.min<sup>-1</sup>) and as percentage of endogenous glucose production (% EGP). N.D. = not determined

| Subjects           | GLYnet<br>(μmol.kg <sup>-1</sup> .min <sup>-1</sup> ) | GLYphos<br>(μmol.kg <sup>-1</sup> .min <sup>-1</sup> ) | GLYnet<br>(% EGP) | GLYphos<br>(% EGP) |
|--------------------|-------------------------------------------------------|--------------------------------------------------------|-------------------|--------------------|
| CON                | 3.1                                                   | 3.8                                                    | 32                | 38                 |
| CON                | 2.0                                                   | 3.8                                                    | 23                | 43                 |
| CON                | 6.3                                                   | 4.6                                                    | 62                | 45                 |
| CON                | 4.1                                                   | 4.3                                                    | 38                | 40                 |
| CON                | 2.5                                                   | 4.1                                                    | 18                | 29                 |
| CON                | 5.8                                                   | 5.3                                                    | 42                | 38                 |
| CON                | 4.2                                                   | 7.6                                                    | 31                | 57                 |
| CON                | 3.8                                                   | 5.9                                                    | 27                | 52                 |
| <b>Mean ± S.D.</b> | <b>4.0 ± 1.5</b>                                      | <b>4.9 ± 1.0</b>                                       | <b>35 ± 9</b>     | <b>41 ± 6</b>      |
| T1Dp               | 3.1                                                   | N.D.                                                   | 16                | N.D.               |
| T1Dp               | 4.4                                                   | 4.3                                                    | 32                | 32                 |
| T1Dp               | 1.8                                                   | 8.0                                                    | 10                | 44                 |
| T1Dp               | 2.3                                                   | 7.5                                                    | 12                | 39                 |
| T1Dp               | 5.3                                                   | 9.9                                                    | 30                | 56                 |
| T1Dp               | 6.6                                                   | 8.2                                                    | 44                | 53                 |
| T1Dp               | 2.9                                                   | N.D.                                                   | 15                | N.D.               |
| T1Dp               | 2.4                                                   | 7.1                                                    | 17                | 50                 |
| T1Dp               | 2.1                                                   | N.D.                                                   | 14                | N.D.               |
| T1Dp               | 1.9                                                   | 4.1                                                    | 14                | 30                 |
| <b>Mean ± S.D.</b> | <b>3.3 ± 1.6</b>                                      | <b>7.0 ± 1.6</b>                                       | <b>20 ± 9</b>     | <b>43 ± 8</b>      |
| T1Di               | 2.1                                                   | N.D.                                                   | 17                | N.D.               |
| T1Di               | 11.8                                                  | 4.6                                                    | 85                | 33                 |
| T1Di               | 6.1                                                   | N.D.                                                   | 45                | N.D.               |
| T1Di               | 4.0                                                   | N.D.                                                   | 31                | N.D.               |
| T1Di               | 5.1                                                   | 4.2                                                    | 33                | 27                 |

SUPPLEMENTARY DATA

|                    |                  |                  |                |               |
|--------------------|------------------|------------------|----------------|---------------|
| T1Di               | 3.6              | 2.8              | 32             | 24            |
| T1Di               | 7.0              | 4.4              | 59             | 37            |
| T1Di               | 2.3              | 2.5              | 17             | 19            |
| <b>Mean ± S.D.</b> | <b>5.3 ± 3.2</b> | <b>3.7 ± 0.8</b> | <b>41 ± 19</b> | <b>28 ± 6</b> |

## SUPPLEMENTARY DATA

**Supplementary Figure 1.**  $^{13}\text{C}$  NMR example spectra from one healthy control (CON), one diabetic patient with poor glycemic control (T1Dp) and one diabetic patient with improved glycemic control (T1Di). 50 minutes acquisition time with formic acid reference signal. Enlarged field depicts glycogen concentration at various time points (6:00 p.m., 12:00 a.m., 2:00 a.m. and 7:00 a.m.).

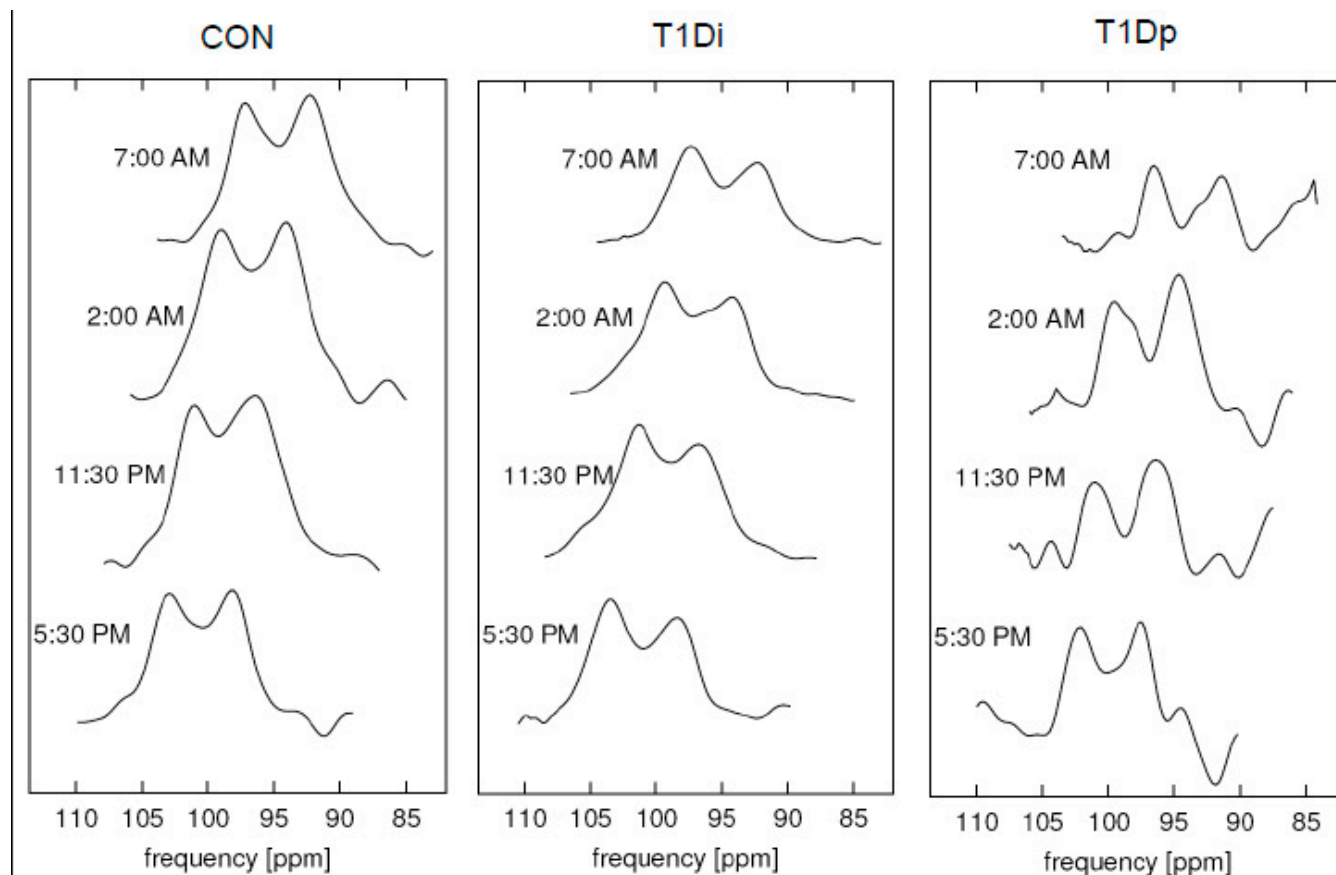

SUPPLEMENTARY DATA

**Supplementary Figure 2.** Individual fluxes of  $^2\text{H}$  NMR spectra of urinary glucuronides following derivatization to monoacetone glucose (MAG). The individual ratio of signal 5 and signal 2 areas ( $\text{H5}/\text{H2}$ ) are shown for each spectrum.

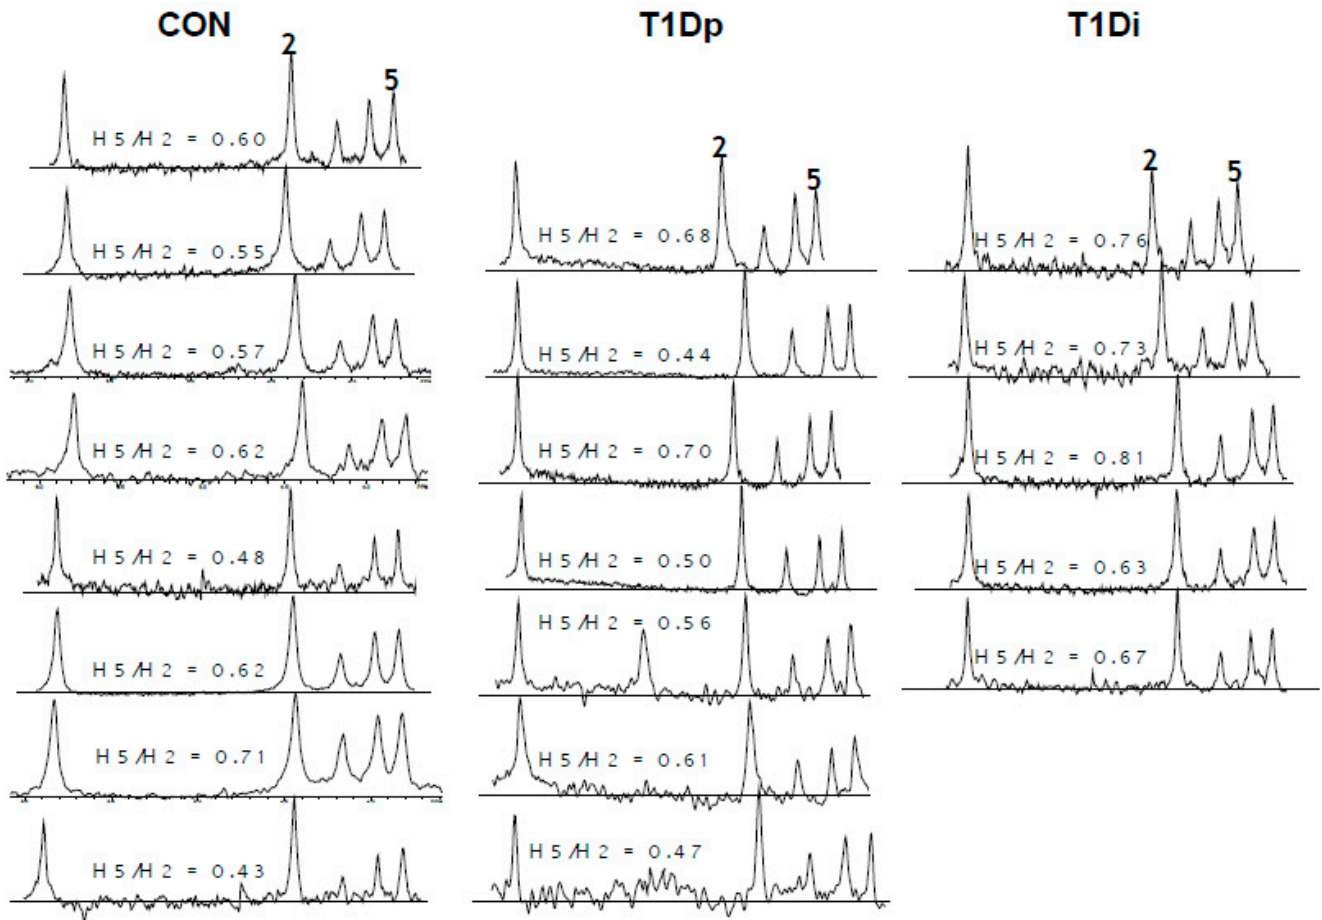

Supplement: supp_db10-1001_Supplementary_Data.pdf [file supp_db10-1001_Supplementary_Data.pdf]
